# Supplementary material for: Apolipoprotein E4 and Insulin Resistance Interact to Impair Cognition and Alter the Epigenome and Metabolome
Source: PubMed Central journal article supplement (PMC5341123; doi:10.1038/srep43701), 2017-03-08
Supplement: srep43701-s1.pdf [file srep43701-s1.pdf]

1 **Apolipoprotein E4 and Insulin Resistance Interact to Impair Cognition and Alter the**  
 2 **Epigenome and Metabolome**

3  
 4 Lance A. Johnson, Eileen R.S. Torres, Soren Impey, Jan F. Stevens and Jacob Raber  
 5

6 **Supplemental Figure Legends**

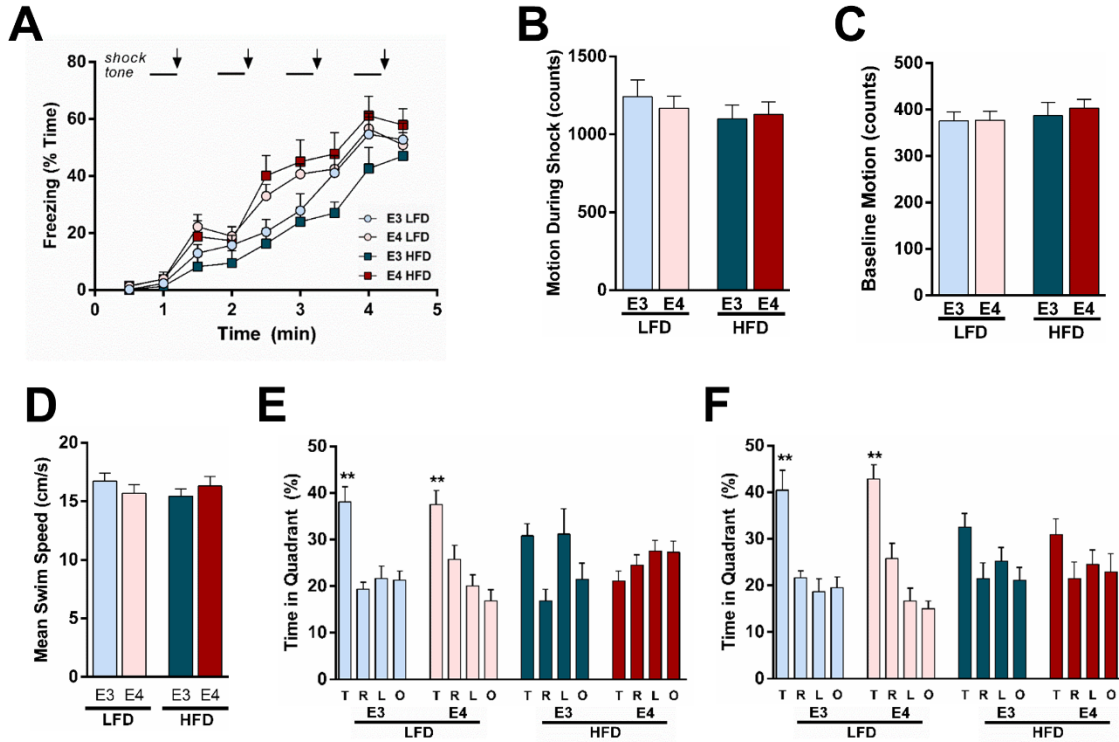

7  
 8 **Supplemental Figure 1. Behavioral measures.**

9  
 10 **A) E3 mice acquire cued fear learning at a slower rate, but freezing is similar by the final**  
 11 **minute of training. Mice were conditioned to associate a cue (tone) with a mild foot shock.**  
 12 **(*n*=10-14) (*p* = 0.010 *APOE* effect, *p* = 0.630, diet effect, repeated measures ANOVA) (final**  
 13 **minute, *p* = 0.608, ANOVA).**

14  
 15 **B) Responsiveness to the shock was similar among all groups. Responsiveness was assessed**  
 16 **by measuring motion during the 2 second foot shock. (*n*=10-14) (*p* = 0.796, ANOVA)**

17  
 18 **C) Generalized fear does not differ between groups. Motion during the first minute (tone-**  
 19 **free) of exposure to the novel environment of the cued fear chamber was measured. (*n*=10-**  
 20 **14) (*p* = 0.724, ANOVA)**

21  
 22 **D) Swim speed during the water maze is similar among all groups. (*n*=10-14) (*p* = 0.643,**  
 23 **ANOVA)**

24

25 **E-F) HFD impairs spatial memory.** The accuracy of long-term spatial memory was  
 26 measured by the percent time spent searching in the target quadrant during the first (G)  
 27 and second (H) 24 hour memory probes. ( $n=10-14$ )  
 28

29 **Note:** For E-F, Target quadrant compared to all other quadrants (ANOVA followed by  
 30 Tukey's multiple comparison test). T, target; R, right; L, left; O, opposite. Error bars  
 31 represent mean  $\pm$  SEM.  
 32

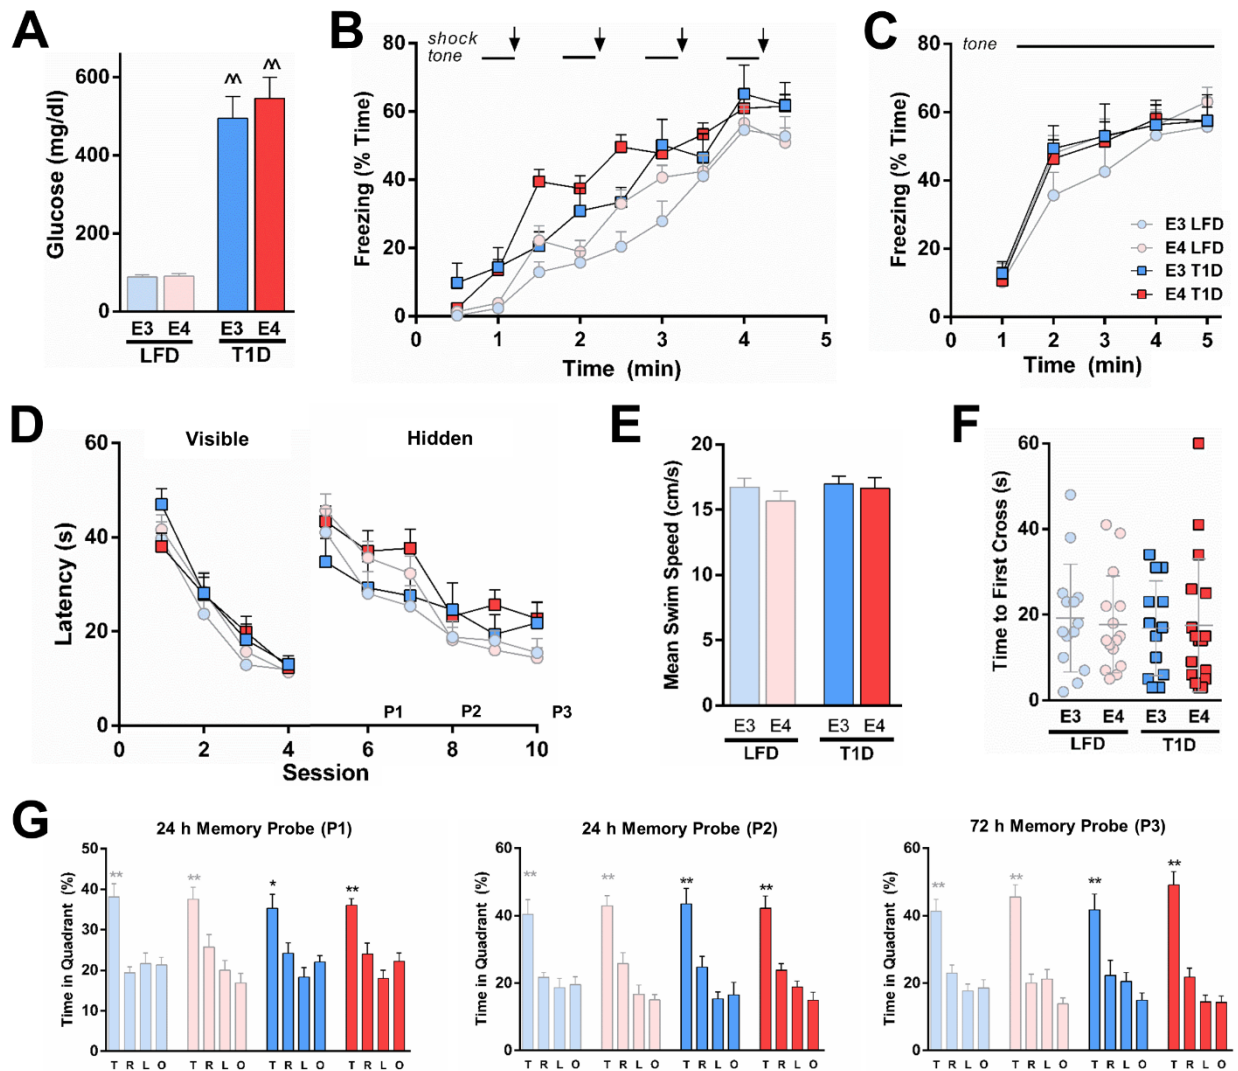

33  
 34  
 35  
 36 Supplemental Figure 2. Cognitive function is unaffected in a model of Type 1 Diabetes.

37  
 38 A) Severe hyperglycemia in E3 and E4 mice treated with STZ, a model of T1D. Blood glucose  
 39 was measured following an overnight fast. ( $n=7-10$ )  
 40

41 B-C) Cued fear memory is unaffected in a model of T1D. Mice were conditioned to associate a  
42 cue (tone) with a mild foot shock (B). Cued memory recall (C) was assessed by measuring  
43 freezing behavior in response to the tone 24 h after training. **(n=13-17)**

44

45 D-E) Spatial learning and memory is unaffected in a model of T1D. Latency to find a visible  
46 (left) or hidden (right) escape platform (D) and swim speed (E) during the water maze. The  
47 timing of tests of long-term memory retention (shown in F-H) are noted (P1-P3). **(n=13-17)**

48

49 F-G) Long-term spatial memory is unaffected in a model of T1D. The accuracy of long-term  
50 spatial memory was measured by calculating the average time at which the mice first cross the  
51 target location (F) and the percent time spent searching in the correct (T, target) quadrant (G).

52 **(n=13-17)**

53

54 Note: For *A*,  $^{**}p < 0.01$ , compared to LFD (ANOVA followed by Tukey's multiple comparisons  
55 test); For *G*,  $^{*}p < 0.05$ ,  $^{**}p < 0.01$ , Target quadrant compared to all other quadrants (ANOVA  
56 followed by Tukey's multiple comparisons test). E3 LFD and E4 LFD data (greyed out) is  
57 reproduced from Figures 1-2. Error bars represent mean  $\pm$  SEM.

58

59

60

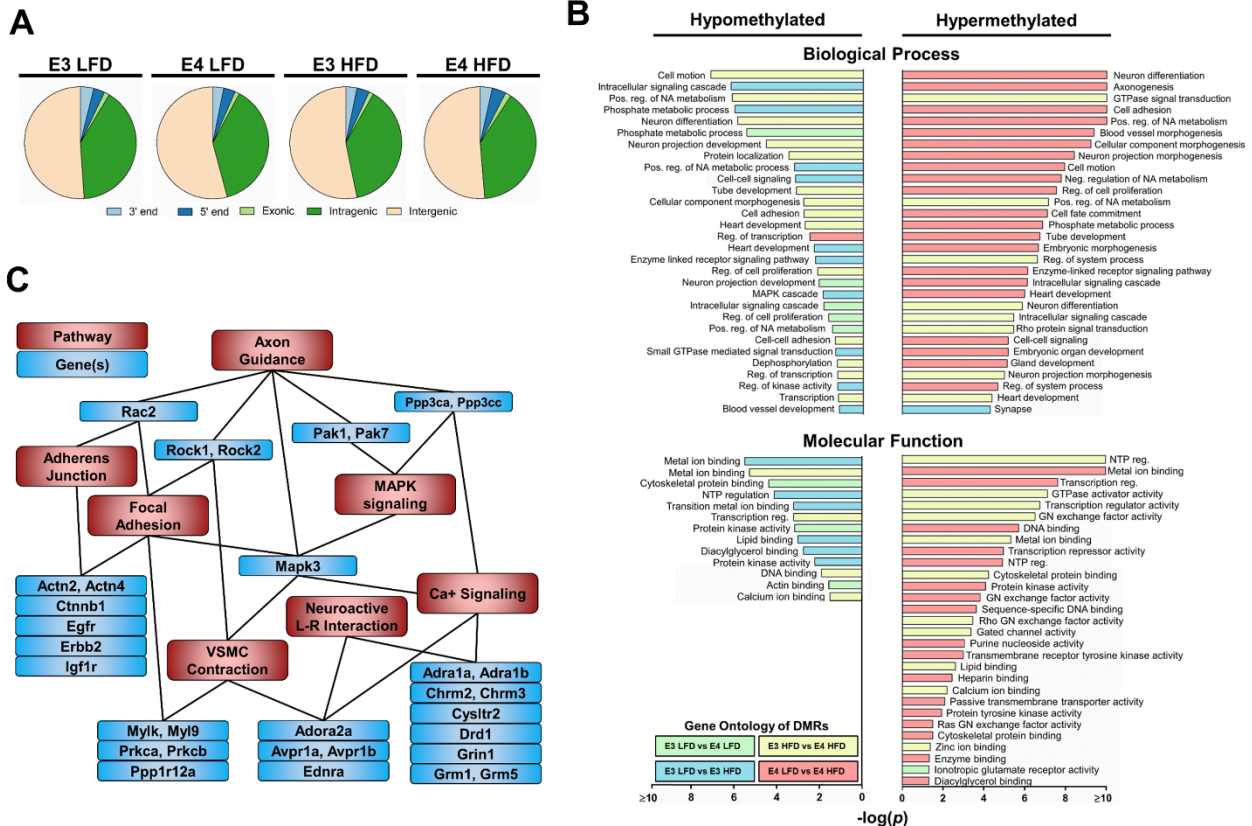

61  
62  
63  
64  
65  
66  
67  
68  
69  
70  
71  
72  
73  
74  
75  
76  
77  
78  
79  
80  
81  
82  
83  
84

Supplemental Figure 3. 5hmC genomic annotation and gene ontology categorization.

A) 5hmC bases are located in similar genomic regions. Pie charts depict accumulation of 5hmC DIP-Seq signal in the indicated genomic regions (DIP-Seq counts per million repeat sequences). Data that matched multiple categories were matched exclusively to the closest annotation. (Distribution within various genomic regions was analyzed using Fisher's exact test,  $p > 0.630$ ).

B) Gene ontology reveals 5hmC enrichment for categories related to neural function, development and metabolism. Bar graph depicts the top 30 most significantly enriched gene ontology terms in the indicated comparisons of DMRs based on biological process and molecular function categories (FDR-adjusted  $-\log[p < 0.01]$ ).

C) Genes that co-regulate multiple biological pathways were uniquely hydroxymethylated in E4 HFD mice. Diagrams depict selected that were significantly associated with altered 5hmC levels in E4 HFD mice.

Abbreviations: DNA, Deoxyribonucleic acid; GN, guanyl-nucleotide; L-R, ligand-receptor; NA, nucleic acid; Neg., Negative; Pos., positive; Reg., Regulation; NTP, Nucleoside-triphosphate

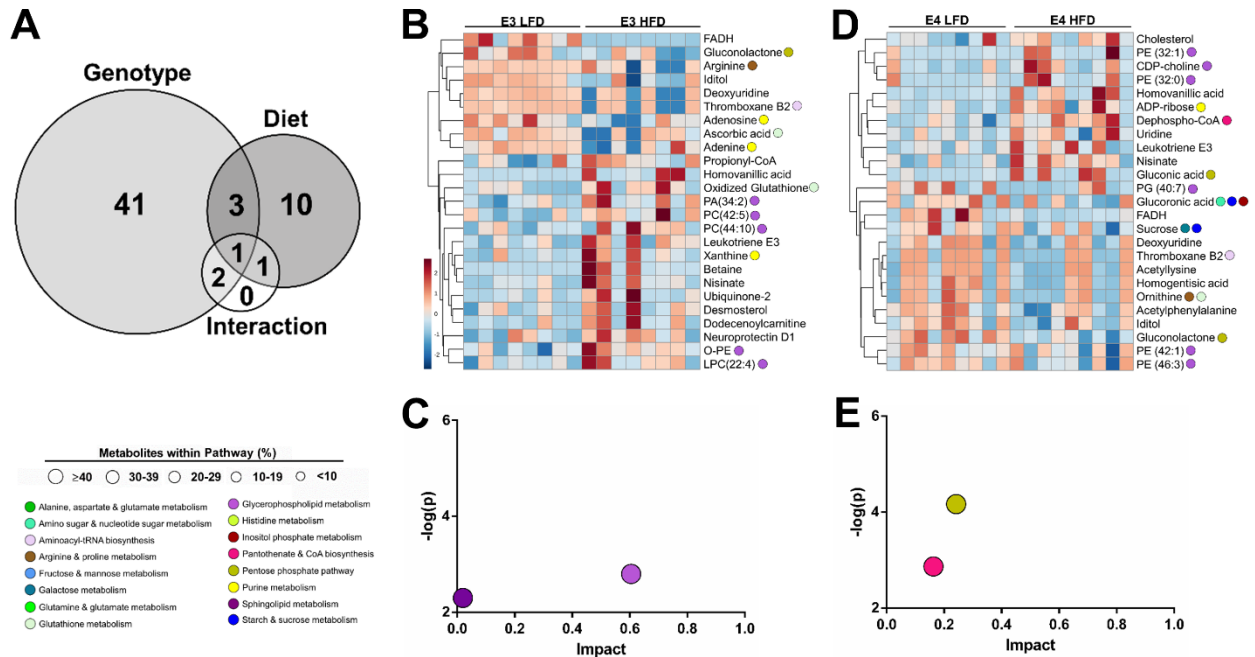

85  
86 Supplemental Figure 4. HFD alters the hippocampal metabolome differently in E3 and E4 mice.

87  
88 A) The majority of significantly altered metabolites differ by *APOE* genotype. Venn diagram  
89 depicts overlap between metabolites affected by *APOE* genotype, HFD, and/or an interaction  
90 between the two ( $p < 0.05$ , ANOVA).

91  
92 B-E) Different metabolic pathways are altered by HFD in E3 and E4 mice. Hierarchical  
93 clustering of the metabolites most significantly altered by HFD in E3 LFD (B) and E4 (D)  
94 mice. Color in the heat map reflects the relative metabolite abundance level, with red being higher, and  
95 blue lower, than the mean value. Colored circles denote the metabolic pathway(s) in which each  
96 metabolite plays a role. A global view of the metabolome was created using a pathway impact  
97 analysis (C,E), which reflects key nodes in pathways that have been significantly altered by HFD  
98 in E3 (C) or E4 (E) mice. Circle size reflects the percentage of all metabolites within a given  
99 pathway that are represented. ( $n=8-9$ ).

100  
101  
102  
103

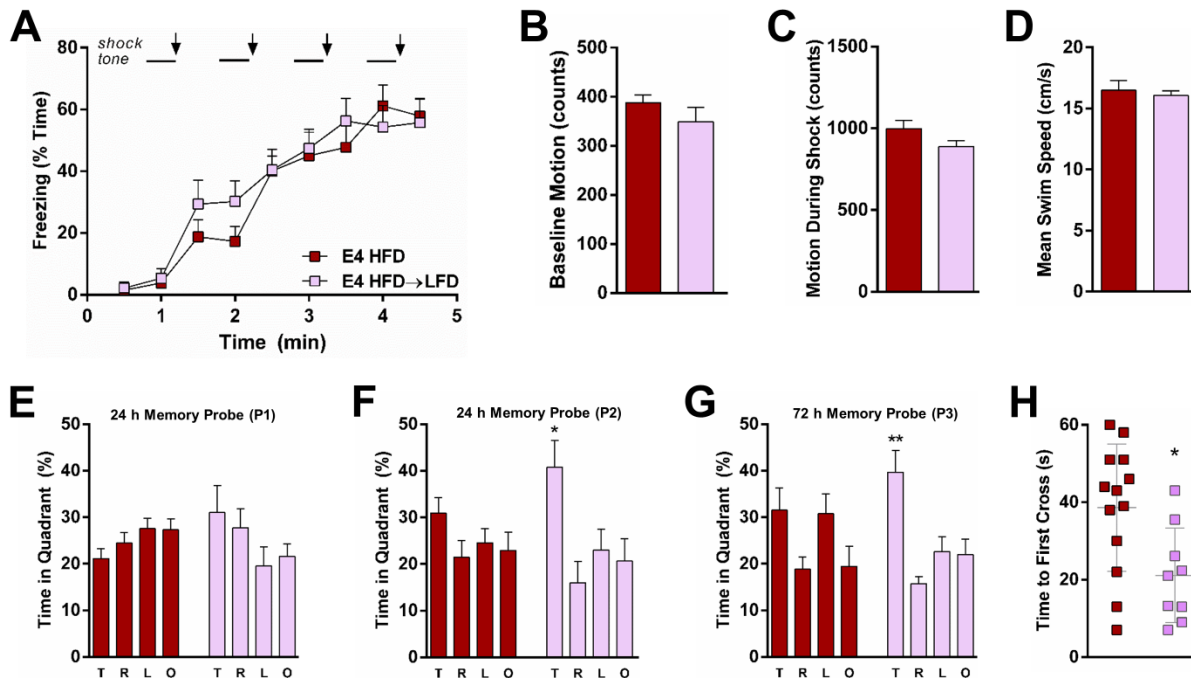

104  
105  
106  
107  
108  
109  
110  
111  
112  
113  
114  
115  
116  
117  
118  
119  
120  
121  
122  
123  
124  
125  
126  
127

Supplemental Figure 5. Diet intervention rescues spatial memory in E4 HFD→LFD mice but does not affect acquisition of cued fear or swim speed.

A) Fear learning is unaffected by the diet intervention. Mice were conditioned to associate a cue (tone) with a mild foot shock. ( $n=9-13$ ).

B-C) E4 HFD and E4 HFD→LFD mice show a similar baseline motion (prior to the tone on the training day) and responsiveness to the shock. (B). Responsiveness to the shock is measured by measuring motion during the 2-second foot shock (C). ( $n=9-13$ ).

D) Swim speed during the water maze is unaffected by the diet intervention. ( $n=9-13$ ).

E-H) Spatial memory is rescued in E4 HFD→LFD mice. Time spent searching in each quadrant of the water maze during the 24 hr (E,F) and 72 hour (G), and average time at which the mice first cross the target location during the memory probes (H). ( $n=9-13$ ).

Note: For E-G,  $*p < 0.05$ ,  $**p < 0.01$ , Target quadrant compared to all other quadrants (ANOVA followed by Tukey's multiple comparison test); For H,  $*p < 0.05$  compared to E4 HFD (two-tailed Student's  $t$  test). Error bars represent mean  $\pm$  SEM. E4 HFD data is reproduced from Figure 2.

128  
129  
130  
131  
132  
133  
134  
135  
136  
137  
138  
139  
140  
141  
142  
143  
144  
145  
146  
147  
148  
149  
150  
151  
152

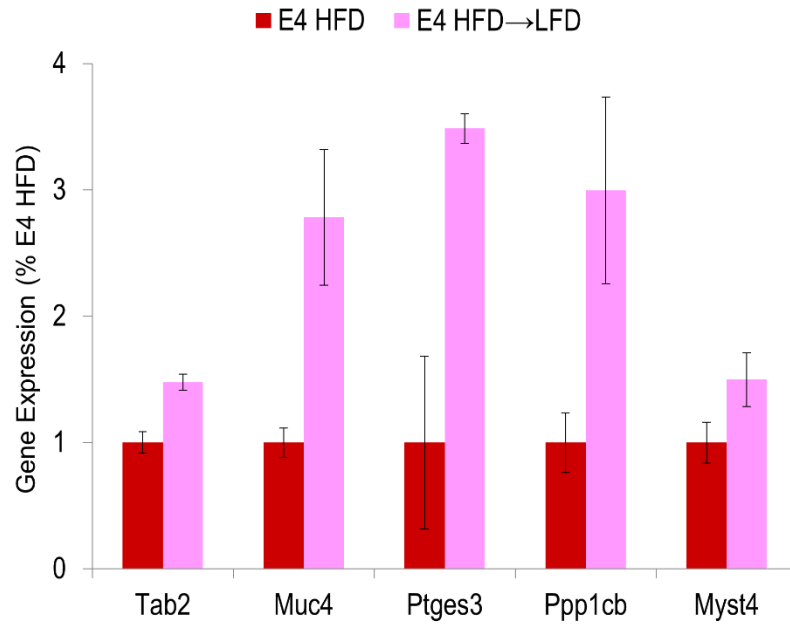

Supplemental Figure 6. 5hmC DIP validation of E4 vs E4 HFD→LFD significantly up-regulated DIP-Seq regions.

Pooled DNA for each condition was subjected to replicate 5hmC DIP (n=4). 5hmC enrichment was assessed using real-time PCR primers that target the DIP-Seq centroid of 5 gene-associated regions selected in an unbiased manner (ranked significance). \*  $p < 0.05$ , \*\*  $p < 0.01$ .
